# Supplementary material for: Value of thyroid cancer history in the prognosis of pancreatic cancer: a SEER population-based study
Source: PubMed Central journal article supplement (PMC10082804; doi:10.1038/s41598-023-32635-z), 2023-04-08
Supplement: 41598_2023_32635_MOESM1_ESM.pdf [file 41598_2023_32635_MOESM1_ESM.pdf]

| Characteristics                | Total<br>(n=33431) | Without prior thyroid cancer<br>(n=33328) | With prior thyroid cancer<br>(n=103) | Statistics      | P value |
|--------------------------------|--------------------|-------------------------------------------|--------------------------------------|-----------------|---------|
| <b>Age at diagnosis, n (%)</b> |                    |                                           |                                      | $\chi^2=0.698$  | 0.705   |
| <68                            | 16258(48.6)        | 16208(48.6)                               | 50(48.5)                             |                 |         |
| 68-79                          | 11301(33.8)        | 11269(33.8)                               | 32(31.1)                             |                 |         |
| >79                            | 5872(17.6)         | 5851(17.6)                                | 21(20.4)                             |                 |         |
| <b>Sex, n (%)</b>              |                    |                                           |                                      | $\chi^2=18.269$ | <0.001  |
| Female                         | 16342(48.9)        | 16270(48.8)                               | 72(69.9)                             |                 |         |
| Male                           | 17089(51.1)        | 17058(51.2)                               | 31(30.1)                             |                 |         |
| <b>Race, n (%)</b>             |                    |                                           |                                      | $\chi^2=5.593$  | 0.061   |
| Black                          | 4613(13.8)         | 4603(13.8)                                | 10(9.7)                              |                 |         |
| White                          | 26188(78.3)        | 26109(78.3)                               | 79(76.7)                             |                 |         |
| Other                          | 2630(7.9)          | 2616(7.8)                                 | 14(13.6)                             |                 |         |
| <b>Tumor size, n (%)</b>       |                    |                                           |                                      | $\chi^2=8.427$  | 0.015   |
| <2.6                           | 7391(22.1)         | 7361(22.1)                                | 30(29.1)                             |                 |         |
| 2.6-3.5                        | 8889(26.6)         | 8874(26.6)                                | 15(14.6)                             |                 |         |
| >3.5                           | 17151(51.3)        | 17093(51.3)                               | 58(56.3)                             |                 |         |
| <b>Grade, n (%)</b>            |                    |                                           |                                      | Fisher          | 0.345   |
| Well differentiated            | 2810(8.4)          | 2796(8.4)                                 | 14(13.6)                             |                 |         |
| Moderately differentiated      | 5462(16.3)         | 5445(16.3)                                | 17(16.5)                             |                 |         |
| Poorly differentiated          | 4693(14.0)         | 4677(14.0)                                | 16(15.5)                             |                 |         |
| Undifferentiated               | 286(0.9)           | 286(0.9)                                  | 0(0)                                 |                 |         |
| Unknown                        | 20180(60.4)        | 20124(60.4)                               | 56(54.4)                             |                 |         |
| <b>Radiotherapy, n (%)</b>     |                    |                                           |                                      | $\chi^2=1.086$  | 0.297   |
| None / Unknown                 | 27293(81.6)        | 27213(81.7)                               | 80(77.7)                             |                 |         |
| Yes                            | 6138(18.4)         | 6115(18.3)                                | 23(22.3)                             |                 |         |
| <b>Chemotherapy, n (%)</b>     |                    |                                           |                                      | $\chi^2=0.062$  | 0.804   |
| None / Unknown                 | 13233(39.6)        | 13191(39.6)                               | 42(40.8)                             |                 |         |
| Yes                            | 20198(60.4)        | 20137(60.4)                               | 61(59.2)                             |                 |         |
| <b>Surgery, n (%)</b>          |                    |                                           |                                      | $\chi^2=2.243$  | 0.134   |
| None / Unknown                 | 24268(72.6)        | 24200(72.6)                               | 68(66.0)                             |                 |         |
| Yes                            | 9163(27.4)         | 9128(27.4)                                | 35(34.0)                             |                 |         |
| <b>AJCC T status, n (%)</b>    |                    |                                           |                                      | $\chi^2=3.112$  | 0.539   |
| T1                             | 2202(6.6)          | 2193(6.6)                                 | 9(8.7)                               |                 |         |
| T2                             | 8032(24.0)         | 8004(24.0)                                | 28(27.2)                             |                 |         |
| T3                             | 14410(43.1)        | 14364(43.1)                               | 46(44.7)                             |                 |         |
| T4                             | 6372(19.1)         | 6357(19.1)                                | 15(14.6)                             |                 |         |
| Unknown                        | 2415(7.2)          | 2410(7.2)                                 | 5(4.9)                               |                 |         |
| <b>AJCC N status, n (%)</b>    |                    |                                           |                                      | $\chi^2=3.347$  | 0.188   |
| N0                             | 18344(54.9)        | 18280(54.8)                               | 64(62.1)                             |                 |         |
| N1                             | 12473(37.3)        | 12438(37.3)                               | 35(34.0)                             |                 |         |
| Unknown                        | 2614(7.8)          | 2610(7.8)                                 | 4(3.9)                               |                 |         |

| Characteristics                                   | Total<br>(n=33431) | Without prior thyroid cancer<br>(n=33328) | With prior thyroid cancer<br>(n=103) | Statistics     | P value |
|---------------------------------------------------|--------------------|-------------------------------------------|--------------------------------------|----------------|---------|
| <b>AJCC M status, n (%)</b>                       |                    |                                           |                                      | $\chi^2=1.236$ | 0.266   |
| M0                                                | 18961(56.7)        | 18897(56.7)                               | 64(62.1)                             |                |         |
| M1                                                | 14470(43.3)        | 14431(43.3)                               | 39(37.9)                             |                |         |
| <b>Primary Site, n (%)</b>                        |                    |                                           |                                      | Fisher         | 0.028   |
| Head of pancreas                                  | 17768(53.1)        | 17712(53.1)                               | 56(54.4)                             |                |         |
| Body of pancreas                                  | 5002(15.0)         | 4996(15.0)                                | 6(5.8)                               |                |         |
| Tail of pancreas                                  | 5357(16.0)         | 5333(16.0)                                | 24(23.3)                             |                |         |
| Pancreatic duct                                   | 99(0.3)            | 98(0.3)                                   | 1(1.0)                               |                |         |
| Islets of Langerhans                              | 21(0.1)            | 219(0.1)                                  | 0                                    |                |         |
| Other specified parts of<br>pancreas              | 665(2.0)           | 665(2.0)                                  | 0                                    |                |         |
| Overlapping lesion of pancreas                    | 2531(7.6)          | 2522(7.6)                                 | 9(8.7)                               |                |         |
| Pancreas, NOS                                     | 1988(5.9)          | 1981(5.9)                                 | 7(6.8)                               |                |         |
| <b>Histological subtype, n (%)</b>                |                    |                                           |                                      | $\chi^2=1.290$ | 0.734   |
| Adenocarcinoma                                    | 23618(70.6)        | 23550(70.7)                               | 68(66.0)                             |                |         |
| Infiltrating duct carcinoma                       | 4239(12.7)         | 4225(12.7)                                | 14(13.6)                             |                |         |
| Neuroendocrine carcinoma                          | 1710(5.1)          | 1704(5.1)                                 | 6(5.8)                               |                |         |
| Other                                             | 3864(11.6)         | 3849(11.5)                                | 15(14.6)                             |                |         |
| <b>Vital status, n (%)</b>                        |                    |                                           |                                      | $\chi^2=2.139$ | 0.144   |
| Alive                                             | 3963(11.9)         | 3946(11.8)                                | 17(16.5)                             |                |         |
| Dead                                              | 29468(88.1)        | 29382(88.2)                               | 86(83.5)                             |                |         |
| <b>SEER cause death<br/>classification, n (%)</b> |                    |                                           |                                      | $\chi^2=5.696$ | 0.058   |
| Alive                                             | 3963(11.9)         | 3946(11.8)                                | 17(16.5)                             |                |         |
| Death due to other causes                         | 1912(5.7)          | 1902(5.7)                                 | 10(9.7)                              |                |         |
| Death due to pancreatic cancer                    | 27556(82.4)        | 27480(82.5)                               | 76(73.8)                             |                |         |
| Survival month, M (Q1, Q3)                        | 9.0(3.0,21.0)      | 9.0 (3.0,21.0)                            | 11.0(5.0,29.0)                       | Z=-2.001       | 0.045   |

**Supplementary Table 1.** Patients' characteristics before propensity score matching. AJCC, American Joint Committee on Cancer(7th). SEER, the Surveillance, Epidemiology, and End Results.

| Characteristics                                   | Total (n=103)    |
|---------------------------------------------------|------------------|
| <b>Age at diagnosis, mean <math>\pm</math> SD</b> | 62.5 $\pm$ 13.8  |
| <b>Sex, n (%)</b>                                 |                  |
| Female                                            | 72(69.9)         |
| Male                                              | 31(30.1)         |
| <b>Race, n (%)</b>                                |                  |
| Black                                             | 10(9.7)          |
| White                                             | 79(76.7)         |
| Other                                             | 14(13.6)         |
| <b>Tumor size, n (%)</b>                          |                  |
| <3.0                                              | 60(58.2)         |
| $\geq$ 3                                          | 21(20.4)         |
| Unknown                                           | 22(21.4)         |
| <b>Grade, n (%)</b>                               |                  |
| Well differentiated                               | 11(10.7)         |
| Moderately differentiated                         | 6(5.8)           |
| Undifferentiated                                  | 1(1.0)           |
| Unknown                                           | 85(82.5)         |
| <b>Radiotherapy, n (%)</b>                        |                  |
| None / Unknown                                    | 57(55.3)         |
| Yes                                               | 46(44.7)         |
| <b>Chemotherapy, n (%)</b>                        |                  |
| None / Unknown                                    | 103(100)         |
| <b>Surgery, n (%)</b>                             |                  |
| None / Unknown                                    | 5(4.9)           |
| Yes                                               | 98(95.1)         |
| <b>AJCC T status, n (%)</b>                       |                  |
| T1                                                | 48(46.6)         |
| T2                                                | 10(9.7)          |
| T3                                                | 17(16.5)         |
| T4                                                | 7(6.8)           |
| Unknown                                           | 21(20.3)         |
| <b>AJCC N status, n (%)</b>                       |                  |
| N0                                                | 71(68.9)         |
| N1                                                | 12(11.6)         |
| Unknown                                           | 20(19.4)         |
| <b>AJCC M status, n (%)</b>                       |                  |
| M0                                                | 82(79.6)         |
| M1                                                | 1(1.0)           |
| Unknown                                           | 20(19.4)         |
| <b>Survival month, M (Q1, Q3)</b>                 | 75.0(44.0,127.0) |
| <b>Vital status, n (%)</b>                        |                  |
| Alive                                             | 17(16.5)         |
| Dead                                              | 86(83.5)         |

| Characteristics                               | Total (n=103) |
|-----------------------------------------------|---------------|
| <b>SEER cause death classification, n (%)</b> |               |
| Alive or dead of other cause                  | 97(94.2)      |
| Dead (attributable to this cancer)            | 6(5.8)        |
| <b>Histological subtype, n (%)</b>            |               |
| Papillary Subtype of the thyroid              | 52(50.5)      |
| Follicular Subtype of the thyroid             | 4(3.9)        |
| Mixed medullary and follicular cell carcinoma | 1(1.0)        |
| Other carcinomas of thyroid gland             | 44(42.7)      |
| Unknown                                       | 2(1.9)        |

**Supplementary Table 2.** Characteristics of 103 thyroid cancer patients. AJCC, American Joint Committee on Cancer(6th). SEER, the Surveillance, Epidemiology, and End Results.

| PC Patients | Without prior thyroid cancer history<br>(The median OS) | With prior thyroid cancer history<br>(The median OS) | P value |
|-------------|---------------------------------------------------------|------------------------------------------------------|---------|
| Subgroup 1  | 9                                                       | 10                                                   | 0.420   |
| Subgroup 2  | —                                                       | —                                                    | 0.550   |
| Subgroup 3  | 12                                                      | —                                                    | 0.008   |

**Supplementary Table 3.** KM survival analysis of different subgroups. — indicates that the median OS is not reached. OS, overall survival.

| Subgroup   | Univariate analysis                               |         | Multivariate analysis                             |         |
|------------|---------------------------------------------------|---------|---------------------------------------------------|---------|
|            | (Reference: without Prior thyroid cancer history) |         | (Reference: without Prior thyroid cancer history) |         |
|            | HR (95% CI)                                       | P value | HR (95% CI)                                       | P value |
| Subgroup 1 | 0.924(0.730-1.170)                                | 0.512   | 0.953(0.745-1.218)                                | 0.702   |
| Subgroup 2 | 1.808(0.545-5.994)                                | 0.332   | 0.471(0.071-3.144)                                | 0.437   |
| Subgroup 3 | 0.468(0.216-1.014)                                | 0.054   | 0.273(0.109-0.684)                                | 0.005   |

**Supplementary Table 4.** Univariate and multivariate Cox survival analysis of OS in different subgroups of PC patients.

| Subgroup   | Gender | HR (95% CI)         | P value |
|------------|--------|---------------------|---------|
| Subgroup 1 | Female | 0.947(0.682 -1.316) | 0.750   |
|            | Male   | 0.646(0.347-1.201)  | 0.170   |
| Subgroup 2 | Female | —                   | —       |
|            | Male   | —                   | —       |
| Subgroup 3 | Female | 0.460(0.100-2.120)  | 0.320   |
|            | Male   | —                   | —       |

**Supplementary Table 5.** Effects of prior thyroid cancer on PC-specific mortality in males and females in different subgroups of PC patients. HR, hazard ratio. CI, confidence interval.

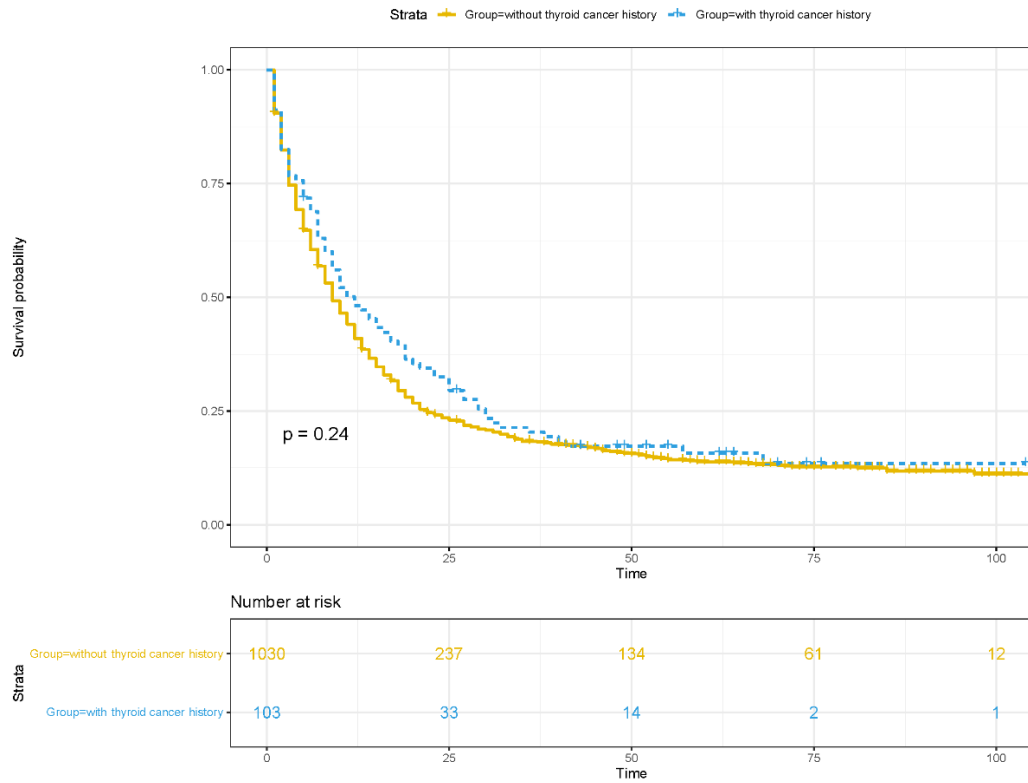

Supplementary Figure 1. The KM survival curves between PC patients with and without prior thyroid cancer.

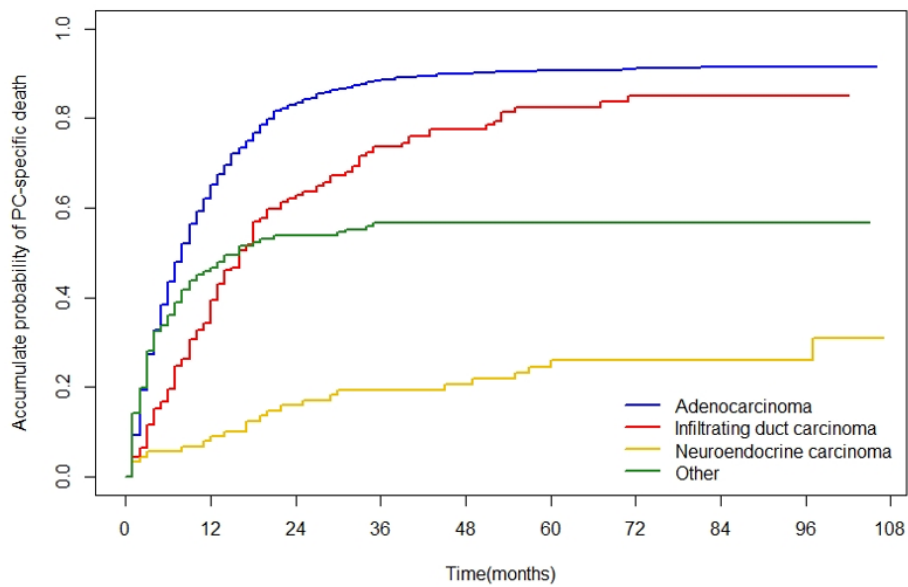

Supplementary Figure 2. The cumulative incidence of PC-specific death in four histological subtypes.

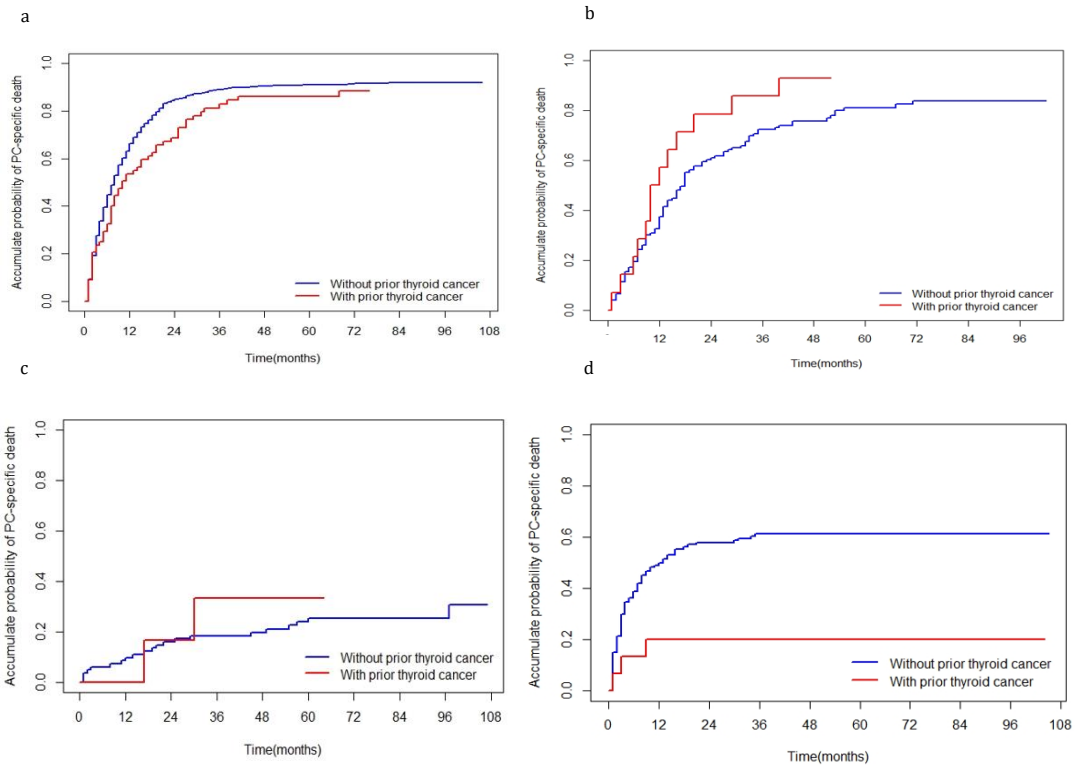

**Supplementary Figure 3.** The cumulative incidence of PC-specific death between PC patients with and without prior thyroid cancer in all histological subtypes. (a)The cumulative incidence of PC-specific death between PC patients with and without prior thyroid cancer in adenocarcinoma.(b) The cumulative incidence of PC-specific death between PC patients with and without prior thyroid cancer in infiltrating duct carcinoma.(c) The cumulative incidence of PC-specific death between PC patients with and without prior thyroid cancer in neuroendocrine carcinoma.(d) The cumulative incidence of PC-specific death between PC patients with and without prior thyroid cancer in other histological subtypes.
